# Supplementary material for: Interventions to improve the self-management support health professionals provide for people with progressive neurological conditions: protocol for a realist synthesis
Source: PubMed Central journal article supplement — BMJ Open. 2017 Mar 20;7(3):e014575. doi: 10.1136/bmjopen-2016-014575 (PMC5372053; doi:10.1136/bmjopen-2016-014575), 2017-03-20
Supplement: bmjopen-2016-014575supp1.pdf [file bmjopen-2016-014575supp1.pdf]

Supplementary File - Stages in the review process.

Although the steps of the process are shown below as individual stages, this is to aid clarity about the overall review process. In practice activities from the three columns are likely to overlap and occur simultaneously.

| Time | Identifying data for inclusion                                                                                                                                       | Data extraction                                                                                                                     | Data synthesis |
|------|----------------------------------------------------------------------------------------------------------------------------------------------------------------------|-------------------------------------------------------------------------------------------------------------------------------------|----------------|
|      | Initial searches run                                                                                                                                                 |                                                                                                                                     |                |
|      | Title screening for relevance                                                                                                                                        |                                                                                                                                     |                |
|      | Abstracts ranked for relevance 1-4                                                                                                                                   |                                                                                                                                     |                |
|      | All relevance 1 papers prioritised for full text screening                                                                                                           |                                                                                                                                     |                |
|      |                                                                                                                                                                      | Author reads full text article and assesses relevance                                                                               |                |
|      |                                                                                                                                                                      | Basic study details recorded                                                                                                        |                |
|      |                                                                                                                                                                      | Author identifies and labels important pieces of explanatory data                                                                   |                |
|      |                                                                                                                                                                      | Author uses the data to formulate initial explanatory accounts which relate to the research questions in an "If-Then" configuration |                |
|      |                                                                                                                                                                      | "If-Then" configurations exported to Excel along with details of the source data                                                    |                |
|      | Abstracts of relevance 2 papers re-read and researcher judgement used to select those likely to be useful based on understanding gained from data extraction to date |                                                                                                                                     |                |

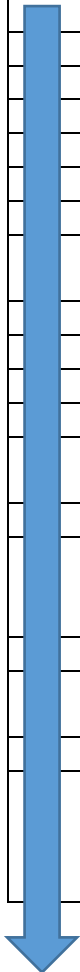

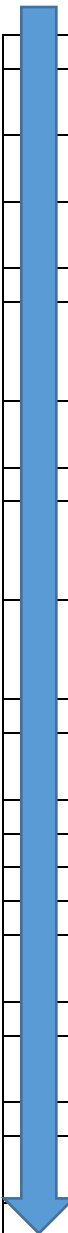

|  |                                                                                                |                                                                                                                           |                                                                                                               |
|--|------------------------------------------------------------------------------------------------|---------------------------------------------------------------------------------------------------------------------------|---------------------------------------------------------------------------------------------------------------|
|  |                                                                                                |                                                                                                                           |                                                                                                               |
|  | Citation tracking from included papers and existing systematic reviews known to authors        |                                                                                                                           |                                                                                                               |
|  |                                                                                                | Full text papers accessed and relevant extracts used to generate explanatory account as above                             |                                                                                                               |
|  |                                                                                                |                                                                                                                           | Author begins to group together accounts that appear related                                                  |
|  |                                                                                                |                                                                                                                           |                                                                                                               |
|  |                                                                                                |                                                                                                                           | Grouped accounts read and used to formulate a refined account in the format of CMO configuration              |
|  |                                                                                                | Original source data that contributed data to each new working CMO imported into NVivo                                    |                                                                                                               |
|  |                                                                                                |                                                                                                                           |                                                                                                               |
|  |                                                                                                | Original data extracts that were used to formulate the explanatory accounts are coded in NVivo under working CMO headings |                                                                                                               |
|  |                                                                                                |                                                                                                                           | Data extracts read alongside working CMOs to check these are true to the original data and refined as needed. |
|  | <b>PROTOCOL PAPER PREPARED</b>                                                                 |                                                                                                                           |                                                                                                               |
|  |                                                                                                |                                                                                                                           | Working CMOs used to inform realist interviews with key informants                                            |
|  |                                                                                                |                                                                                                                           |                                                                                                               |
|  |                                                                                                |                                                                                                                           | Working CMOs presented to stakeholder group                                                                   |
|  |                                                                                                |                                                                                                                           |                                                                                                               |
|  |                                                                                                |                                                                                                                           | Priority areas for further searching identified                                                               |
|  | Review remaining abstracts ranked 2 and 3 to check if any likely to address new priority areas |                                                                                                                           |                                                                                                               |
|  |                                                                                                |                                                                                                                           |                                                                                                               |
|  | Run additional targeted searches to identify further primary data                              |                                                                                                                           |                                                                                                               |
|  |                                                                                                |                                                                                                                           |                                                                                                               |
|  | Continue citation tracking and table of contents searches                                      |                                                                                                                           |                                                                                                               |
|  |                                                                                                |                                                                                                                           |                                                                                                               |

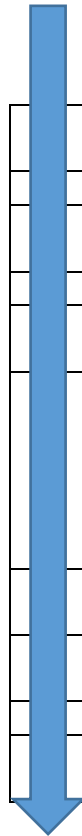

|  |                                                                                                                                                                                                     |                                                                           |                                                                                     |
|--|-----------------------------------------------------------------------------------------------------------------------------------------------------------------------------------------------------|---------------------------------------------------------------------------|-------------------------------------------------------------------------------------|
|  |                                                                                                                                                                                                     | New relevant data imported directly to NVivo and coded under related CMO. |                                                                                     |
|  |                                                                                                                                                                                                     |                                                                           |                                                                                     |
|  |                                                                                                                                                                                                     |                                                                           | CMOs further refined through discussion of the study authors                        |
|  |                                                                                                                                                                                                     |                                                                           |                                                                                     |
|  |                                                                                                                                                                                                     |                                                                           | CMOs considered alongside existing known middle range theories                      |
|  | Priority areas for further searching identified<br>- Searching for alternative middle range theories<br>- Searching for primary data to fill possible 'gaps' indicated by the middle range theories |                                                                           |                                                                                     |
|  |                                                                                                                                                                                                     | New relevant data imported directly to NVivo and coded under related CMO  |                                                                                     |
|  |                                                                                                                                                                                                     |                                                                           | CMOs further refined in discussion between study team                               |
|  |                                                                                                                                                                                                     |                                                                           |                                                                                     |
|  |                                                                                                                                                                                                     |                                                                           | Refined CMOs presented to stakeholder group for further discussion and confirmation |
