# Supplementary material for: Interventions to improve the self-management support health professionals provide for people with progressive neurological conditions: protocol for a realist synthesis
Source: PubMed Central journal article supplement — BMJ Open. 2017 Mar 20;7(3):e014575. doi: 10.1136/bmjopen-2016-014575 (PMC5372053; doi:10.1136/bmjopen-2016-014575), 2017-03-20
Supplement: bmjopen-2016-014575supp2.pdf [file bmjopen-2016-014575supp2.pdf]

## Supplementary File 2

Initial searches run

### **Medline via Ovid** 1996-present.

Searched 27/4/16

1. exp Self Care/ or Patient Care Planning/ or Patient Education as Topic/ or Patient Participation/ or Adaptation, Psychological/ or Self Efficacy/ or Rehabilitation/
2. (self manag\* or Self-manag\* or Self-car\* or Self care).mp.
3. (Action plan\* or Care plan\* or Management plan\* or Health coach\* or Train\*).tw.
4. (Self-efficacy or Self efficacy or empower\* or rehab\* or coping).tw.
5. (goal\* adj5 (set\* or plan\*)).tw.
6. 1 or 2 or 3 or 4 or 5
7. exp Health Personnel/ or Physicians/ or Nurses/ or Psychology/ or Occupational Therapy/ or Physical Therapists/ or Professional-Patient Relations/ or Physician-Patient Relations/ or Nurse-Patient Relations/ or Attitude of Health Personnel/
8. (therapist\* or clinician\* or health professional\* or health personnel or practitioner\* or physiotherapist\* or psychologist\* or nurse\* or provider\* or doctor\* or physician\* or staff).tw.
9. 7 or 8
10. Motor Neuron Disease/ or Multiple Sclerosis/ or Parkinson Disease/ or HuntingtonDisease/ or Supranuclear Palsy, Progressive/ or Amyotrophic Lateral Sclerosis/ or Nervous System Diseases/
11. (motor neuron\* or multiple sclerosis or demyelinating disease\* or parkinson\* or Huntington\* or progressive supranuclear palsy or amyotrophic lateral sclerosis or Progressive neurological or Degenerative neurological).mp.
12. 10 or 11
13. 6 and 9 and 12
14. limit 13 to (english language and yr="1996 -Current")

### **PsycINFO**

Searched 29/4/16.

1. exp Self Management/
2. Adjustment/
3. Self Efficacy/

4. Rehabilitation/ or exp Neuropsychological Rehabilitation/
5. Treatment Planning/
6. Client Education/
7. Client Participation/
8. Coping Behavior/
9. 1 or 2 or 3 or 4 or 5 or 6 or 7 or 8
10. (self manag\* or Self-manag\* or Self-car\* or Self care).mp.
11. (Action plan\* or Care plan\* or Management plan\* or Health coach\* or Train\*).tw.
12. (Self-efficacy or Self efficacy or empower\* or rehab\* or coping).tw.
13. (goal\* adj5 (set\* or plan\*)).tw.
14. 9 or 10 or 11 or 12 or 13
15. (therapist\* or clinician\* or health professional\* or health personnel or practitioner\* or physiotherapist\* or psychologist\* or nurse\* or provider\* or doctor\* or physician\* or staff).tw.
16. exp Health Personnel/
17. Physicians/
18. Nurses/
19. Clinical Psychologists/ or Psychologists/
20. Occupational Therapists/
21. Physical Therapists/
22. Health Personnel Attitudes/
23. Therapeutic Processes/
24. 15 or 16 or 17 or 18 or 19 or 20 or 21 or 22 or 23
25. (motor neuron\* or multiple sclerosis or demyelinating disease\* or parkinson\* or Huntington\* or progressive supranuclear palsy or amyotrophic lateral sclerosis or Progressive neurological or Degenerative neurological).mp.
26. exp Multiple Sclerosis/
27. exp Parkinson's Disease/
28. exp Huntingtons Disease/
29. exp Progressive Supranuclear Palsy/
30. exp Amyotrophic Lateral Sclerosis/
31. Nervous System Disorders/ or exp Neurodegenerative Diseases/
32. 25 or 26 or 27 or 28 or 29 or 30 or 31

33. 14 and 24 and 32
34. limit 33 to (english language and yr="1996 - 2016")

## CINAHL

Searched 29/4/16

1. (MH "Self Care+") OR (MH "Patient Care Plans") OR (MH "Patient Education") OR (MH "Consumer Participation") OR (MH "Adaptation, Psychological") OR (MH "Self-Efficacy") OR (MH "Rehabilitation")
2. (TX self-care) OR (TX self-manag\*)
3. (AB "action plan\*") OR (AB "care plan\*") OR (AB "management plan\*") OR (AB "health coach\*") OR (AB "train\*")
4. (AB self-efficacy) OR (AB empower\*) OR (AB rehab\*) OR (AB coping)
5. AB (goal\*) N5 (set\* OR plan\*)
6. 1 or 2 or 3 or 4 or 5
7. (MH "Health Personnel") OR (MH "Attitude of Health Personnel") OR (MH "Physicians") OR (MH "Nurses") OR (MH "Psychologists") OR (MH "Occupational Therapists") OR (MH "Physical Therapists") OR (MH "Professional-Patient Relations") OR (MH "Physician-Patient Relations") OR (MH "Nurse-Patient Relations")
8. (MH "Motor Neuron Diseases") OR (MH "Multiple Sclerosis") OR (MH "Parkinson Disease") OR (MH "Huntington's Disease") OR (MH "Supranuclear Palsy, Progressive") OR (MH "Amyotrophic Lateral Sclerosis") OR (MH "Nervous System Diseases")
9. TX ("motor neuron\*" or "multiple sclerosis" or "demyelinating disease\*" or parkinson\* or Huntington\* or "progressive supranuclear palsy" or "amyotrophic lateral sclerosis" or "Progressive neurological" or "Degenerative neurological")
10. 8 or 9
11. 6 and 7 and 10
12. limit 13 to (english language and yr="1996 -Current")

## ERIC

Searched 29/4/16

1. (TX self-care) OR (TX self-manag\*)
2. (AB "action plan\*") OR (AB "care plan\*") OR (AB "management plan\*") OR (AB "health coach\*") OR (AB "train\*")
3. (AB self-efficacy) OR (AB empower\*) OR (AB rehab\*) OR (AB coping)
4. AB (goal\*) N5 (set\* OR plan\*)
5. 1 or 2 or 3 or 4
6. AB (therapist\* or clinician\* or "health professional\*" or "health personnel" or practitioner\* or physiotherapist\* or psychologist\* or nurse\* or provider\* or doctor\* or physician\* or staff)
7. TX ("motor neuron\*" or "multiple sclerosis" or "demyelinating disease\*" or parkinson\* or Huntington\* or "progressive supranuclear palsy" or "amyotrophic lateral sclerosis" or "Progressive neurological" or "Degenerative neurological")

8. 5 and 6 and 7

### **PEDro**

Searched 29/4/16

Self-management (in abstract and title) AND sub-discipline = neurology

### **Cochrane Library – Trials**

Searched 3/5/16

#1 self manag\* or Self-manag\* or Self-car\* or Self care:ti,ab,kw (Word variations have been searched)

#2 Action plan\* or Care plan\* or Management plan\* or Health coach\* or Train\*

#3 Self-efficacy or Self efficacy or empower\* or rehab\* or coping or goal

#4 #1 or #2 or #3

#5 therapist\* or clinician\* or health professional\* or health personnel or practitioner\* or physiotherapist\* or psychologist\* or nurse\* or provider\* or doctor\* or physician\* or staff

#6 #4 and #5

#7 "motor neuron\*" or "multiple sclerosis" or "demyelinating disease\*" or parkinson\* or Huntington\* or "progressive supranuclear palsy" or "amyotrophic lateral sclerosis" or "Progressive neurological" or "Degenerative neurological"

#8 #6 and #7

### **EMBASE**

Searched 3/5/16

1. patient care planning/
2. exp self care/
3. patient education/
4. patient participation/
5. adaptive behavior/
6. \*self concept/
7. rehabilitation/
8. (self manag\* or Self-manag\* or Self-car\* or Self care).mp.

9. (Action plan\* or Care plan\* or Management plan\* or Health coach\* or Train\*).tw.
10. (Self-efficacy or Self efficacy or empower\* or rehab\* or coping).tw.
11. (goal\* adj5 (set\* or plan\*)).tw.
12. 1 or 2 or 3 or 4 or 5 or 6 or 7 or 8 or 9 or 10 or 11
13. exp health care personnel/
14. physician/
15. nurse/
16. psychologist/
17. physiotherapist/
18. occupational therapist/
19. \*human relation/
20. exp health personnel attitude/
21. (therapist\* or clinician\* or health professional\* or health personnel or practitioner\* or physiotherapist\* or psychologist\* or nurse\* or provider\* or doctor\* or physician\* or staff).tw.
22. 13 or 14 or 15 or 16 or 17 or 18 or 19 or 20 or 21
23. (motor neuron\* or multiple sclerosis or demyelinating disease\* or parkinson\* or Huntington\* or progressive supranuclear palsy or amyotrophic lateral sclerosis or Progressive neurological or Degenerative neurological).mp.
24. multiple sclerosis/
25. Parkinson disease/
26. Huntington chorea/
27. progressive supranuclear palsy/
28. amyotrophic lateral sclerosis/ or motor neuron disease/
29. \*neurologic disease/
30. 23 or 24 or 25 or 26 or 27 or 28 or 29
31. 12 and 22 and 30

31 not (Algeria\* or Egypt\* or Liby\* or Morocc\* or Tunisia\* or Western Sahara\* or Angola\* or Benin or Botswana\* or Burkina Faso or Burundi or Cameroon or Cape Verde or Central African Republic or Chad or Comoros or Congo or Djibouti or Eritrea or Ethiopia\* or Gabon or Gambia\* or Ghana or Guinea or Keny\* or Lesotho or Liberia or Madagasca\* or Malawi or Mali or Mauritania or Mauritius or Mayotte or Mozambiq\* or Namibia\* or Niger or Nigeria\* or Reunion or Rwand\* or Saint Helena or Senegal or Seychelles or Sierra Leone or Somalia or South Africa\* or Sudan or Swaziland or Tanzania or Togo or Ugand\* or Zambia\* or Zimbabw\* or China or Chinese or Hong Kong or Macao or Mongolia\* or Taiwan\* or Belarus or Moldov\* or Russia\* or Ukraine or Afghanistan or Armenia\* or Azerbaijan or Bahrain or Cyprus or Cypriot or Georgia\* or Iran\* or Iraq\* or Jordan\* or Kazakhstan or

Kuwait or Kyrgyzstan or Leban\* or Oman or Pakistan\* or Palestin\* or Qatar or Saudi Arabia or Syria\* or Tajikistan or Turkmenistan or United Arab Emirates or Uzbekistan or Yemen or Bangladesh\* or Bhutan or British Indian Ocean Territory or Brunei Darussalam or Cambodia\* or India\* or Indonesia\* or Lao or People's Democratic Republic or Malaysia\* or Maldives or Myanmar or Nepal or Philippin\* or Singapore or Sri Lanka or Thai\* or Timor Leste or Vietnam or Albania\* or Andorra or Bosnia\* or Herzegovina\* or Bulgaria\* or Croatia\* or Faroe Islands or Greenland or Liechtenstein or Lithuani\* or Macedonia or Malta or maltese or Romania or Serbia\* or Montenegro or Svalbard or Argentina\* or Belize or Bolivia\* or Brazil\* or Colombia\* or Costa Rica\* or Cuba or Ecuador or El Salvador or French Guiana or Guatemala\* or Guyana or Haiti or Honduras or Jamaica\* or Nicaragua\* or Panama or Paraguay or Peru or Puerto Rico or Suriname or Uruguay or Venezuela or developing countr\* or south America\*).ti,sh.

33. limit 32 to (human and english language and yr="1996 -Current")

34. 33 not (palliative or paediatric\* or child\* or diagnos\*).ti.
