# Supplementary material for: Interventions to improve the self-management support health professionals provide for people with progressive neurological conditions: protocol for a realist synthesis
Source: PubMed Central journal article supplement — BMJ Open. 2017 Mar 20;7(3):e014575. doi: 10.1136/bmjopen-2016-014575 (PMC5372053; doi:10.1136/bmjopen-2016-014575), 2017-03-20
Supplement: bmjopen-2016-014575supp3.pdf [file bmjopen-2016-014575supp3.pdf]

Supplementary File 3

Abstract screening tool

**Criteria for assessing likely relevance of sources**

|                       |                                                                                                                                                                                                                                                                                                      |
|-----------------------|------------------------------------------------------------------------------------------------------------------------------------------------------------------------------------------------------------------------------------------------------------------------------------------------------|
| 1 – Highly relevant   | Relates to a PNC AND describes the implementation of a HP initiated SMS activity<br>OR<br>Relates to a PNC and describes training health professionals in SMS<br>OR<br>Relates to a PNC AND Likely to include description of health professionals views and experiences of SMS in general            |
| 2- Probably relevant  | Describes the training of HPs in a SMS approach<br>OR<br>Describes the implementation of a HP initiated SMS activity<br>OR<br>Likely to include description of health professionals’ views and experiences of SMS<br>OR<br>Describes experiences of people with PNCs who have been provided with SMS |
| 3 –Possibly relevant  | SMS described but involvement of health professionals is unclear (SMS only)<br>OR<br>Unclear whether intervention described involves self-management<br>OR<br>Quantitative data on a SMS intervention<br>OR<br>Describes the specific self-management support needs of people with PNCs              |
| 4 – Likely irrelevant | Does not meet above criteria                                                                                                                                                                                                                                                                         |

Definitions

PNCs= Progressive neurological conditions– Multiple Sclerosis, Motor Neuron Disease (includes ALS), Huntington’s, Parkinson’s, Progressive Supranuclear Palsy. (exclude dementia, exclude acute brain injury, exclude stroke)

SMS = Self-management support – Apply definition used by Mills et al (1) Must include at least one of the following life skills: problem solving, decision-making, resource utilisation, patient-provider relations, taking action, goal setting and/or confidence building mechanisms. Must involve a patient-centred or empowerment approach to learning (vs traditional education approach of one way transmission of information)

HPs = Health professionals that work within the NHS – exclude complementary therapists and gym instructors.

1. Mills SL, Pumarino J, Clark N, Carroll S, Dennis S, Koehn S, et al. Understanding how self-management interventions work for disadvantaged populations living with chronic conditions: protocol for a realist synthesis. *BMJ Open*. 2014;4(7):e005822.
